# Supplementary material
Source: MDPI journal article supplement (https://www.mdpi.com/1424-2818/15/3/311)
Supplement: s1 [file s1]

## Supplementary Materials:

### Systematics and Phylogenetic Interrelationships of the Enigmatic Late Jurassic Shark *Protospinax annectans* Woodward, 1918 with Comments on the Shark-Ray Sister Group Relationship

Patrick L. Jambura <sup>1,2,\*</sup>, Eduardo Villalobos-Segura <sup>1</sup>, Julia Türtcher <sup>1,2</sup>, Arnaud Begat <sup>1,2</sup>, Manuel Andreas Staggli <sup>1,2</sup>, Sebastian Stumpf <sup>1</sup>, René Kindlimann <sup>3</sup>, Stefanie Klug <sup>4</sup>, Frederic Lacombe <sup>5</sup>, Burkhard Pohl <sup>5,6</sup>, John G. Maisey <sup>7</sup>, Gavin J. P. Naylor <sup>8</sup> and Jürgen Kriwet <sup>1,2</sup>

<sup>1</sup> University of Vienna, Department of Palaeontology, Josef-Holaubek-Platz 2, 1090 Vienna, Austria

<sup>2</sup> University of Vienna, Vienna Doctoral School of Ecology and Evolution (VDSEE), Djerassiplatz 1, 1030 Vienna, Austria

<sup>3</sup> Haimuseum und Sammlung R. Kindlimann, 8607 Aathal-Seegräben, Switzerland

<sup>4</sup> Georg-August Universität Göttingen, 37077 Göttingen, Germany

<sup>5</sup> Interprospekt Group, 1724 Ferpicloz, Switzerland

<sup>6</sup> Wyoming Dinosaur Center, Thermopolis, WY, USA

<sup>7</sup> American Natural History Museum, Department of Vertebrate Paleontology, New York, NY, USA

<sup>8</sup> Florida Museum of Natural History, University of Florida, Gainesville, FL, USA

\* Author to whom correspondence should be addressed.

This document contains **Supplementary Figures S1-S5**.

See also:

**Supplementary Material S1:** Character matrix (nexus file) used in this study.

**Supplementary Material S2:** Character list used in this study.

**Supplementary Material S3:** TNT scripts.

**Supplementary Material S4:** PAUP scripts.

**Supplementary Material S5:** Logfile TNT parsimony analysis with “conservative” molecular backbone constraint.

**Supplementary Material S6:** Logfile TNT parsimony analysis with fully enforced molecular backbone constraint.

**Supplementary Material S7:** Logfile TNT unconstrained parsimony analysis.

**Supplementary Material S8:** Logfile PAUP unconstrained parsimony analysis.

**Supplementary Material S9:** Logfile PAUP maximum-likelihood analysis.

**Supplementary Table S1:** Vertebral measurements of PBP-SOL-8007.

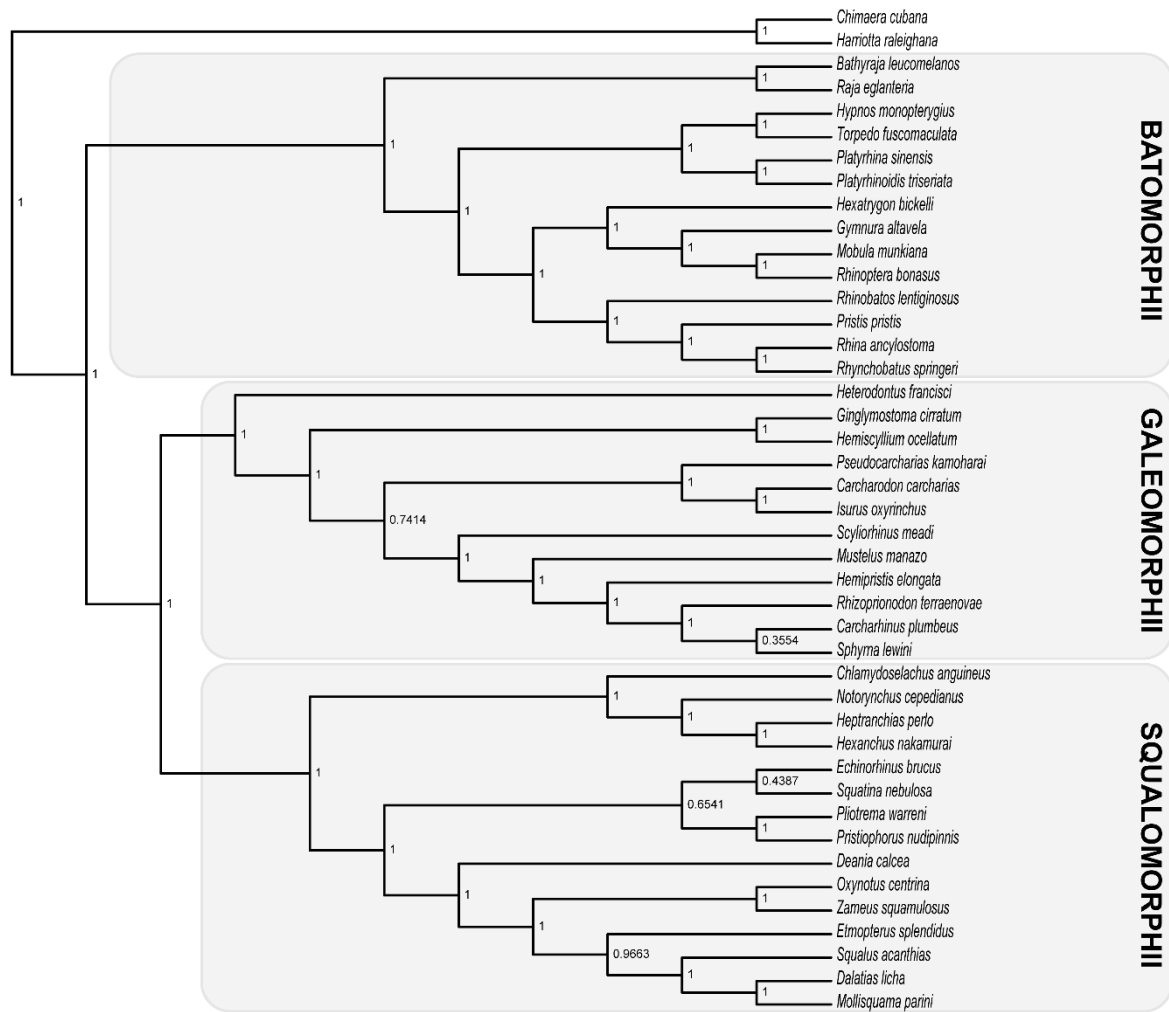

**Figure S1.** Molecular backbone constraint tree and posterior probability values generated from the dataset of Stein *et al.* [1].

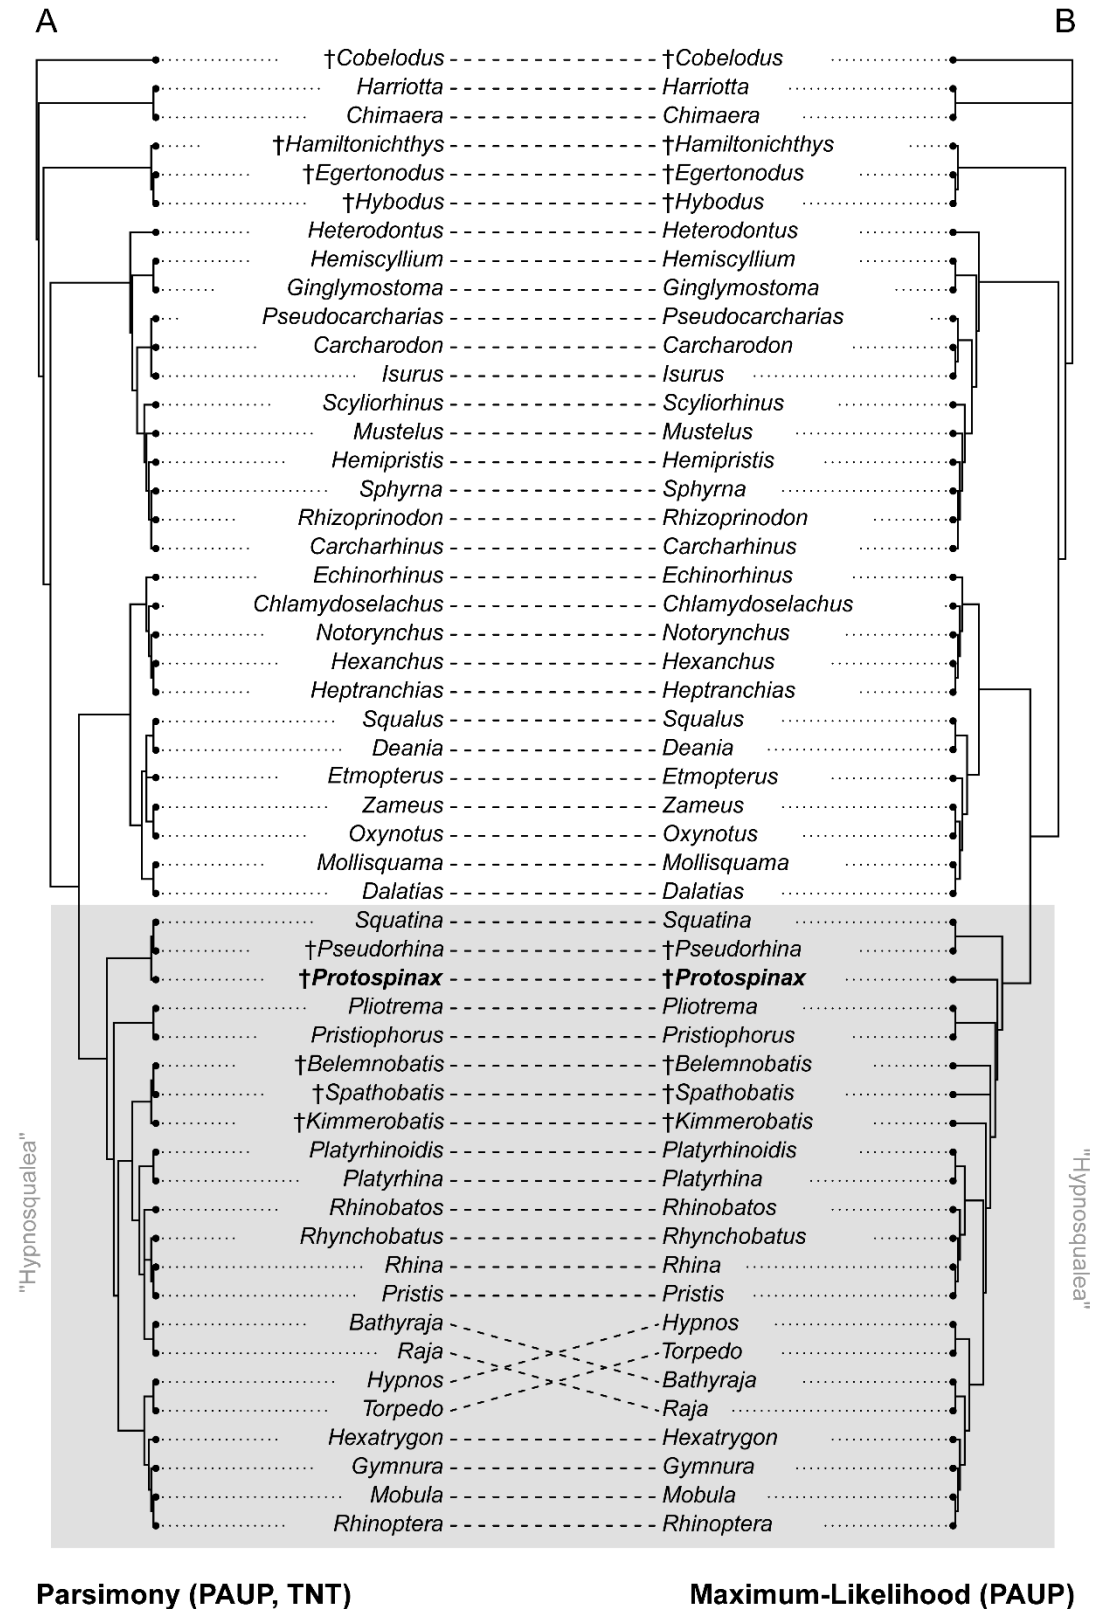

**Figure S2.** Phylogenetic trees obtained from two different analyses: (A) strict consensus tree from an unconstrained parsimony analysis computed in PAUP and TNT; (B) single tree generated by the (unconstrained) maximum likelihood analysis computed in PAUP.

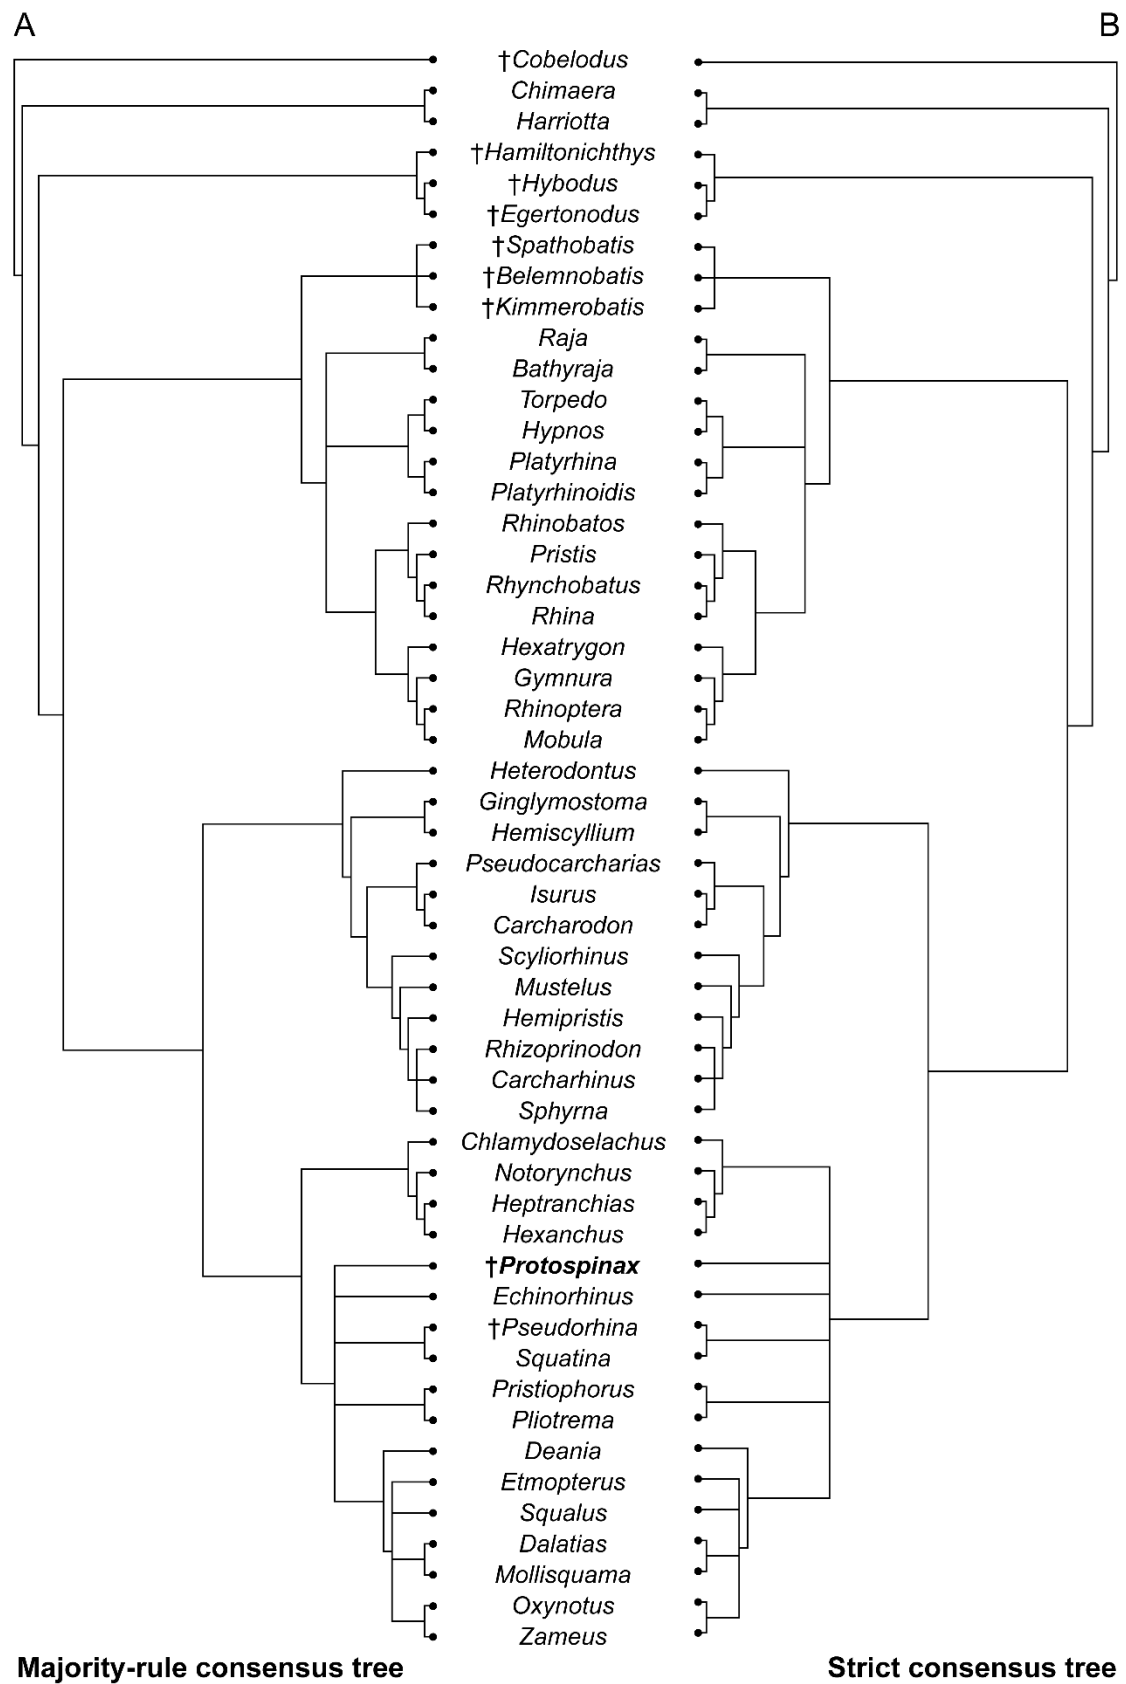

**Figure S3.** Majority rule consensus tree (A) and strict consensus tree (B) from a constrained parsimony analysis with fully enforced molecular backbone constraints.

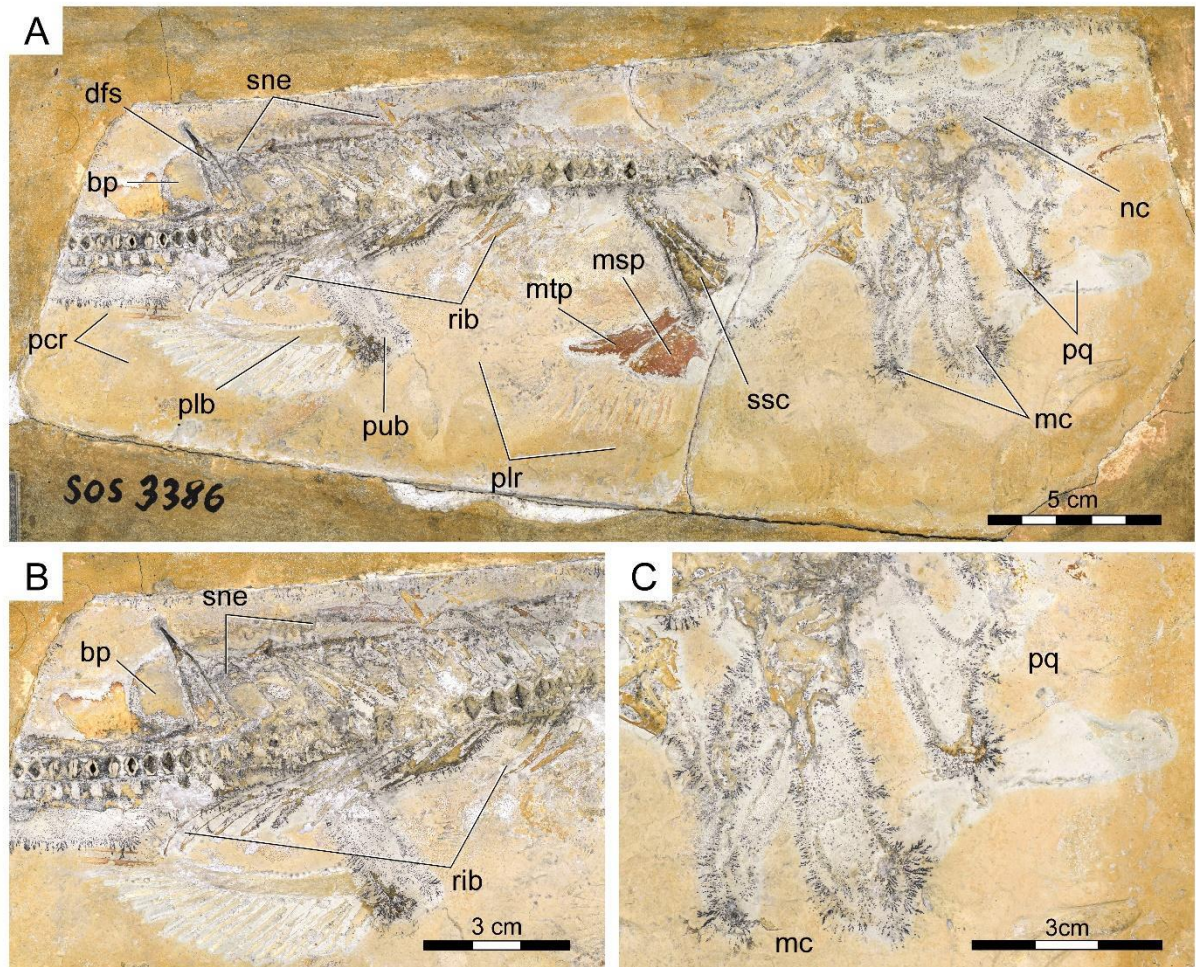

**Figure S4.** *Protospinax annectans* Woodward, 1918, JME-SOS 3386, from the lower Tithonian of the Solnhofen Archipelago, Bavaria, Germany. (A) whole specimen under normal light; (B) close-up view of the pelvic region; (C) close-up view of the mandibular arches. *Abbreviations:* **bp**, basal plate; **dfs**, dorsal fin spine; **mc**, Meckel's cartilage; **mtp**, mesopterygium; **mtp**, metapterygium; **nc**, neurocranium; **pcr**, pectoral radial; **plb**, pelvic basipterygium; **plr**, pelvic radial; **pq**, palatoquadrate; **prp**, propterygium; **pub**, puboischiadic bar; **rib**, vertebral ribs; **ssc**, scapulocoracoid; **sne**, supraneuralia.



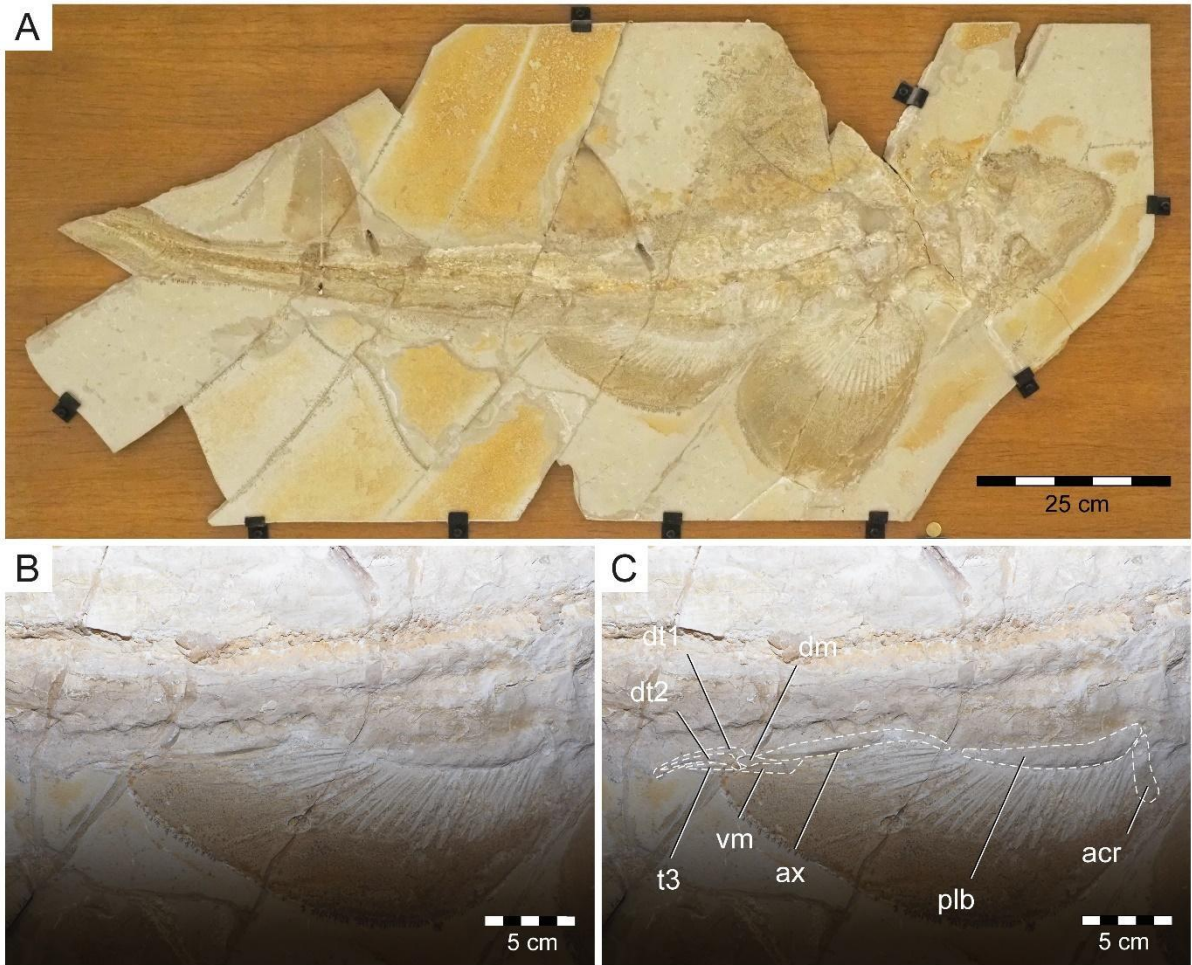

**Figure S5.** *Protospinax annectans* Woodward, 1918, MB 14-12-22-1, from Blumenberg, Eichstätt (Solnhofen Archipelago, lower Tithonian), Bavaria, Germany. (A) whole specimen under normal light; (B) close-up view of the pelvic region; (C) close-up view of the pelvic region with the skeletal elements of the clasper highlighted. *Abbreviation:* **acr**, anterior compound radial; **ax**, axial cartilage; **dm**, dorsal marginal cartilage; **dt1**, dorsal terminal cartilage 1; **dm2**, dorsal marginal cartilage 2; **plb**, pelvic basipterygium; **t3**, accessory 3 terminal cartilage; **vm**, ventral marginal cartilage.

## References

1. Stein, R.W.; Mull, C.G.; Kuhn, T.S.; Aschliman, N.C.; Davidson, L.N.K.; Joy, J.B.; Smith, G.J.; Dulvy, N.K.; Mooers, A.O. Global Priorities for Conserving the Evolutionary History of Sharks, Rays and Chimaeras. *Nat. Ecol. Evol.* **2018**, *2*, 288–298, doi:10.1038/s41559-017-0448-4.
