# Supplementary material
Source: MDPI journal article supplement (https://www.mdpi.com/1424-2818/15/3/311)
Supplement: s1 [file s1]

**Table A1.** Vertebral measurements of PBP-SOL-8007. Three measurements (M) were taken for the cranial-caudal length (CCL) of each vertebral centrum (V) and the average value (Av) computed.

| Vertebra | CCL<br>[mm]<br>M1 | CCL<br>[mm]<br>M2 | CCL<br>[mm]<br>M3 | CCL<br>[mm]<br>Av | Vertebra | CCL<br>[mm]<br>M1 | CCL<br>[mm]<br>M2 | CCL<br>[mm]<br>M3 | CCL<br>[mm]<br>Av | Vertebra      | CCL<br>[mm]<br>M1 | CCL<br>[mm]<br>M2 | CCL<br>[mm]<br>M3 | CCL<br>[mm]<br>Av |
|----------|-------------------|-------------------|-------------------|-------------------|----------|-------------------|-------------------|-------------------|-------------------|---------------|-------------------|-------------------|-------------------|-------------------|
| V1       | 5.8               | 6.1               | 5.6               | 5.8               | V51      | 6.8               | 6.4               | 6.8               | 6.7               | V89           | 7.0               | 6.0               | 6.0               | 6.3               |
| V2       | 6.5               | 5.8               | 5.8               | 6.0               | V52      | 6.4               | 7.5               | 6.6               | 6.8               | V90           | 6.5               | 6.0               | 6.3               | 6.3               |
| V3       | 8.5               | 8.9               | 8.8               | 8.7               | V53      | 7.0               | 6.8               | 6.6               | 6.8               | V91           | 6.3               | 5.9               | 6.0               | 6.1               |
| V4       | 7.8               | 7.6               | 8.0               | 7.8               | V54      | 7.6               | 7.0               | 6.4               | 7.0               | V92           | 5.6               | 5.7               | 5.8               | 5.7               |
| V5       | 8.0               | 7.7               | 7.3               | 7.7               | V55      | 7.4               | 7.1               | 6.7               | 7.1               | V93           | 5.6               | 6.0               | 5.9               | 5.8               |
| V6-V20   |                   |                   |                   |                   | V56      | 6.9               | 6.5               | 6.0               | 6.5               | V94           | 5.6               | 5.8               | 5.6               | 5.7               |
|          |                   |                   |                   |                   | V57      | 6.4               | 6.3               | 6.2               | 6.3               | V95           | 5.7               | 5.5               | 5.5               | 5.6               |
|          |                   |                   |                   |                   | V58      | 6.3               | 6.6               | 6.9               | 6.6               | V96           | 5.7               | 5.8               | 5.7               | 5.7               |
| V21      | 7.6               | 7.7               | 7.6               | 7.6               | V59      | 6.2               | 6.3               | 6.4               | 6.3               | V97           | 5.5               | 5.2               | 5.0               | 5.2               |
| V22      | 8.5               | 8.7               | 7.8               | 8.3               | V60      | 6.6               | 6.2               | 6.0               | 6.3               | V98           | 5.1               | 5.5               | 5.4               | 5.3               |
| V23      | 7.5               | 8.2               | 7.7               | 7.8               | V61      | 6.4               | 6.3               | 6.4               | 6.4               | V99           | 5.6               | 5.5               | 5.1               | 5.4               |
| V24      | 7.7               | 7.7               | 7.6               | 7.7               | V62      | 6.3               | 6.0               | 6.1               | 6.1               | V100          | 5.0               | 4.8               | 4.9               | 4.9               |
| V25      | 7.5               | 8.1               | 8.1               | 7.9               | V63      | 6.5               | 6.5               | 6.8               | 6.6               | V101          | 4.9               | 5.1               | 4.9               | 5.0               |
| V26      | 7.3               | 7.2               | 7.5               | 7.3               | V64      | 5.9               | 6.5               | 6.0               | 6.1               | V102          | 5.3               | 5.5               | 5.8               | 5.5               |
| V27      | 10.3              | 10.2              | 10.7              | 10.4              | V65      | 5.4               | 5.8               | 5.9               | 5.7               | V103          | 5.3               | 5.0               | 4.9               | 5.1               |
| V28      | 9.0               | 9.0               | 9.8               | 9.3               | V66      | 5.8               | 6.1               | 6.1               | 6.0               | V104          | 4.7               | 5.3               | 5.7               | 5.2               |
| V29      | 8.5               | 8.7               | 8.8               | 8.7               | V67      | 6.3               | 6.3               | 6.2               | 6.3               | V105          | 5.6               | 5.6               | 5.7               | 5.6               |
| V30      | 8.8               | 9.2               | 9.3               | 9.1               | V68      | 6.5               | 6.2               | 6.5               | 6.4               | V106          | 4.7               | 4.3               | 4.7               | 4.6               |
| V31      | 8.3               | 9.6               | 9.0               | 9.0               | V69      | 6.5               | 6.5               | 6.3               | 6.4               | V107          | 4.4               | 4.8               | 4.4               | 4.5               |
| V32      | 9.2               | 8.0               | 8.1               | 8.4               | V70      | 6.6               | 6.5               | 6.7               | 6.6               | V108          | 4.2               | 4.5               | 4.0               | 4.2               |
| V33      | 7.0               | 7.6               | 7.0               | 7.2               | V71      | 6.5               | 6.9               | 7.1               | 6.8               | V109          | 4.7               | 4.1               | 3.5               | 4.1               |
| V34      | 8.3               | 7.1               | 7.2               | 7.5               | V72      | 6.4               | 6.6               | 6.2               | 6.4               | V110-<br>V117 |                   |                   |                   |                   |
| V35      | 7.0               | 6.0               | 7.2               | 6.7               | V73      | 5.9               | 6.5               | 6.6               | 6.3               |               |                   |                   |                   |                   |
| V36      | 7.5               | 7.0               | 7.7               | 7.4               | V74      | 5.7               | 6.2               | 5.8               | 5.9               |               |                   |                   |                   |                   |
| V37      | 6.2               | 5.8               | 6.4               | 6.1               | V75      | 6.5               | 5.8               | 6.5               | 6.3               | V118          | 3.2               | 3.0               | 2.9               | 3.0               |
| V38      | 5.9               | 5.5               | 5.7               | 5.7               | V76      | 6.6               | 6.4               | 6.4               | 6.5               | V119          | 3.0               | 2.8               | 3.4               | 3.1               |
| V39      | 6.6               | 6.8               | 6.0               | 6.5               | V77      | 6.6               | 5.9               | 6.1               | 6.2               | V120          | 2.6               | 2.8               | 2.7               | 2.7               |
| V40      | 7.1               | 6.8               | 6.8               | 6.9               | V78      | 6.5               | 6.4               | 6.0               | 6.3               | V121          | 3.0               | 3.0               | 2.9               | 3.0               |
| V41      | 6.7               | 7.5               | 7.0               | 7.1               | V79      | 6.3               | 6.2               | 6.2               | 6.2               | V122          | 2.8               | 3.1               | 2.7               | 2.9               |
| V42      | 7.0               | 8.0               | 7.0               | 7.3               | V80      | 6.4               | 5.9               | 6.0               | 6.1               | V123          | 2.3               | 2.5               | 2.5               | 2.4               |
| V43      | 6.3               | 7.2               | 6.6               | 6.7               | V81      | 6.2               | 5.9               | 6.0               | 6.0               | V124          | 3.0               | 3.0               | 2.8               | 2.9               |
| V44      | 6.1               | 7.1               | 7.4               | 6.9               | V82      | 6.5               | 6.2               | 6.0               | 6.2               | V125          | 2.9               | 3.1               | 2.7               | 2.9               |
| V45      | 6.6               | 7.0               | 7.6               | 7.1               | V83      | 6.0               | 5.6               | 5.7               | 5.8               | V126          | 2.6               | 2.9               | 2.9               | 2.8               |
| V46      | 6.0               | 6.5               | 7.5               | 6.7               | V84      | 6.3               | 6.5               | 6.1               | 6.3               | V127          | 2.4               | 2.4               | 2.5               | 2.4               |
| V47      | 5.9               | 6.7               | 6.5               | 6.4               | V85      | 5.7               | 6.2               | 6.3               | 6.1               | V128          | 2.1               | 2.1               | 2.2               | 2.1               |
| V48      | 6.4               | 6.4               | 6.4               | 6.4               | V86      | 6.2               | 5.8               | 5.9               | 6.0               | V129          | 2.2               | 2.8               | 2.3               | 2.4               |
| V49      | 7.5               | 7.0               | 6.6               | 7.0               | V87      | 6.2               | 5.7               | 5.5               | 5.8               | V130          | 2.9               | 2.9               | 2.7               | 2.8               |
| V50      | 6.9               | 6.4               | 6.2               | 6.5               | V88      | 7.0               | 6.2               | 6.4               | 6.5               | V131          | 1.8               | 1.8               | 1.8               | 1.8               |
